# Supplementary material
Source: PubMed Central journal article supplement (PMC4658239)

**Figure S1 – Incidence of Post-operative Any AKI across biomarker quintiles in those with and without a pre-operative baseline eGFR  $\leq 60$  ml/min/1.73m<sup>2</sup>**, The figure demonstrates the incidence of any AKI across biomarker quintiles in the cohort dichotomized by baseline eGFR. There was a progressive increase in AKI across all biomarkers in those with a baseline eGFR  $> 60$  ml/min/1.73m<sup>2</sup>, with the 5<sup>th</sup> quintile having the highest rates in this portion of the cohort. In those with an eGFR  $\leq 60$  ml/min/1.73m<sup>2</sup>, while there was a progressive increase in AKI for IL-18, KIM-1 and albumin, the remaining biomarkers had 3<sup>rd</sup> and 4<sup>th</sup> quintiles which outperformed the 5<sup>th</sup>. The rates of AKI were significantly different for all biomarker sub-cohorts (p<0.05) except for CysC in those with lower baseline eGFR

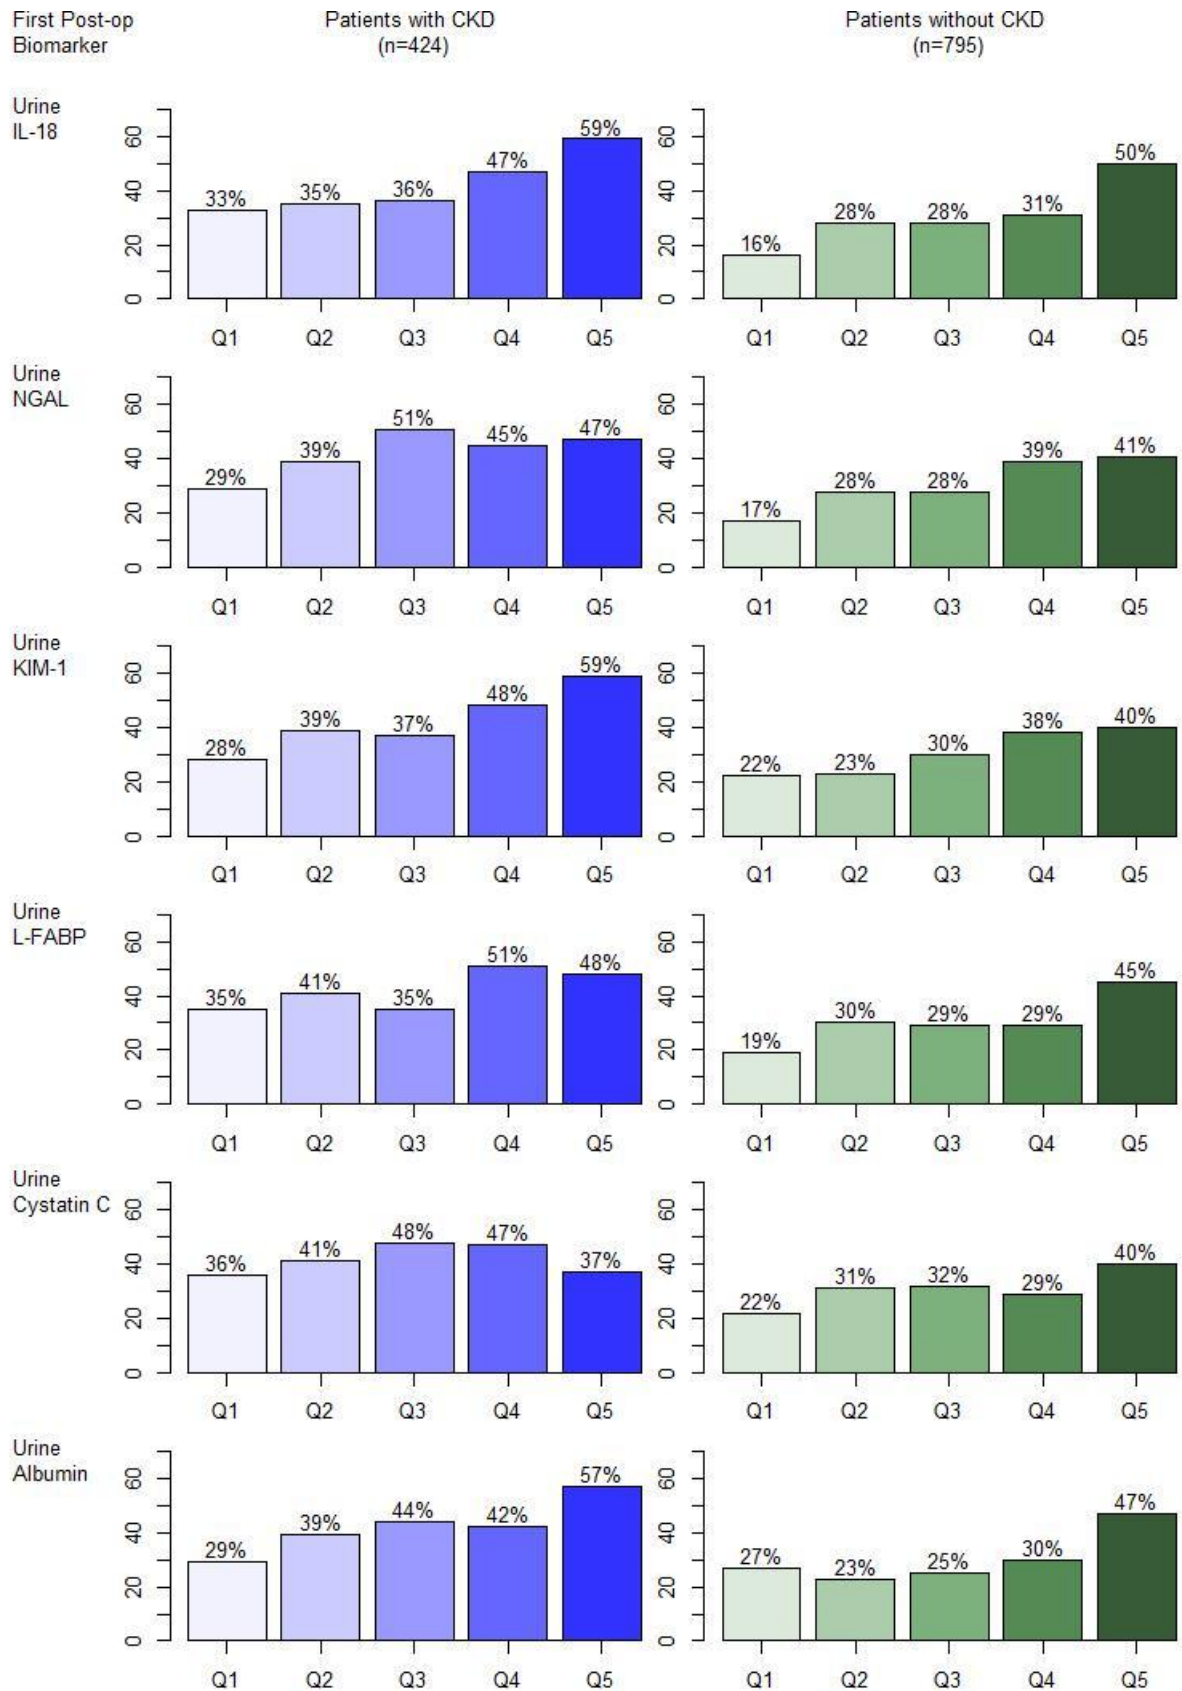

Supplement: NIHMS717511-supplement-1.pdf [file NIHMS717511-supplement-1.pdf]
