# Supplementary material
Source: PubMed Central journal article supplement (PMC4658239)
Supplement: NIHMS717511-supplement-2.pdf [file NIHMS717511-supplement-2.pdf]

**Item S1: Association of Continuous Post-operative Biomarkers and Continuous eGFR with Any and Severe AKI, unadjusted and adjusted**

**Table a- Association of Continuous Post-operative Biomarkers and Continuous eGFR with Any AKI – unadjusted**

| Biomarker | Coefficient for Biomarker |         | Coefficient for eGFR |         | Coefficient for interaction Between Biomarker and eGFR |         |
|-----------|---------------------------|---------|----------------------|---------|--------------------------------------------------------|---------|
|           | Coefficient               | p-value | Coefficient          | p-value | Coefficient                                            | p-value |
| IL-18     | 0.111                     | <.0001  | -0.011               | <.0001  | 0.002                                                  | 0.0008  |
| NGAL      | 0.07                      | <.0001  | -0.011               | <.0001  | 0.002                                                  | 0.0069  |
| KIM-1     | 0.206                     | <.0001  | -0.008               | <.0001  | 0.002                                                  | 0.3033  |
| LFABP     | 0.099                     | <.0001  | -0.018               | <.0001  | 0.002                                                  | 0.008   |
| CysC      | 0.077                     | 0.0012  | -0.011               | <.0001  | 0.003                                                  | 0.0074  |
| Albumin   | 0.101                     | <.0001  | -0.009               | <.0001  | 0.001                                                  | 0.2558  |

Biomarkers and eGFR were centered in these models.

**Table b. Association of Continuous Post-operative Biomarkers and Continuous eGFR with Any AKI –adjusted**

| Biomarker | Coefficient for Biomarker |         | Coefficient for eGFR |         | Coefficient for interaction Between Biomarker and eGFR |         |
|-----------|---------------------------|---------|----------------------|---------|--------------------------------------------------------|---------|
|           | Coefficient               | p-value | Coefficient          | p-value | Coefficient                                            | p-value |
| IL-18     | 0.085                     | <.0001  | -0.009               | <.0001  | 0.002                                                  | 0.0043  |
| NGAL      | 0.042                     | 0.0017  | -0.009               | 0.0001  | 0.001                                                  | 0.0192  |
| KIM-1     | 0.176                     | <.0001  | -0.006               | 0.0072  | 0.002                                                  | 0.214   |
| LFABP     | 0.071                     | 0.0003  | -0.015               | 0.0001  | 0.002                                                  | 0.0145  |
| CysC      | 0.048                     | 0.0316  | -0.009               | 0.0001  | 0.002                                                  | 0.0201  |
| Albumin   | 0.076                     | 0.0007  | -0.008               | 0.0012  | 0.001                                                  | 0.3001  |

Biomarkers and eGFR were centered in these models.

**Table c. Association of Continuous Post-operative Biomarkers and Continuous eGFR with Severe AKI – unadjusted**

| Biomarker | Coefficient for Biomarker |         | Coefficient for eGFR |         | Coefficient for interaction Between Biomarker and eGFR |         |
|-----------|---------------------------|---------|----------------------|---------|--------------------------------------------------------|---------|
|           | Coefficient               | p-value | Coefficient          | p-value | Coefficient                                            | p-value |
| IL-18     | 0.291                     | <.0001  | -0.009               | 0.4004  | 0.001                                                  | 0.8279  |
| NGAL      | 0.192                     | <.0001  | -0.007               | 0.4319  | 0                                                      | 0.9952  |
| KIM-1     | 0.548                     | <.0001  | -0.004               | 0.5612  | -0.003                                                 | 0.6177  |
| LFABP     | 0.208                     | 0.0045  | -0.021               | 0.2795  | 0.004                                                  | 0.4165  |
| CysC      | 0.18                      | 0.0551  | -0.005               | 0.5229  | -0.005                                                 | 0.3707  |
| Albumin   | 0.279                     | 0.0002  | -0.004               | 0.6748  | 0                                                      | 0.9189  |

Biomarkers and eGFR were centered in these models.

**Table d. Association of Continuous Post-operative Biomarkers and Continuous eGFR with Severe AKI –adjusted**

| Biomarker | Coefficient for Biomarker |         | Coefficient for eGFR |         | Coefficient for interaction Between Biomarker and eGFR |         |
|-----------|---------------------------|---------|----------------------|---------|--------------------------------------------------------|---------|
|           | Coefficient               | p-value | Coefficient          | p-value | Coefficient                                            | p-value |
| IL-18     | 0.213                     | <.0001  | -0.007               | 0.5038  | -0.001                                                 | 0.712   |
| NGAL      | 0.099                     | 0.0342  | -0.008               | 0.3421  | -0.001                                                 | 0.6377  |
| KIM-1     | 0.511                     | 0.0001  | -0.004               | 0.581   | 0.001                                                  | 0.9294  |
| LFABP     | 0.072                     | 0.3225  | -0.015               | 0.3352  | 0.001                                                  | 0.7193  |
| CysC      | 0.11                      | 0.1433  | -0.006               | 0.4049  | -0.005                                                 | 0.0985  |
| Albumin   | 0.205                     | 0.0195  | -0.004               | 0.6545  | -0.003                                                 | 0.3792  |

Biomarkers and eGFR were centered in these models.
