# Supplementary material
Source: PubMed Central journal article supplement (PMC4658239)
Supplement: NIHMS717511-supplement-3.pdf [file NIHMS717511-supplement-3.pdf]

**Item S2: Unadjusted and adjusted relative risk for individual biomarker quintiles, uncorrected and corrected for urine creatinine**

**Table a – Early Post-operative Biomarker Quintiles association with Any AKI and interaction with Pre-operative eGFR**

| Quintile Range          | eGFR ≤ 60 ml/min/1.73 m <sup>2</sup> (n= 424) |                   | eGFR > 60 ml/min/1.73 m <sup>2</sup> (n=795) |                   | eGFR x Biomarker p-value |
|-------------------------|-----------------------------------------------|-------------------|----------------------------------------------|-------------------|--------------------------|
|                         | unadjusted RR                                 | adjusted RR       | unadjusted RR                                | adjusted RR       |                          |
| <b>Urine IL-18</b>      |                                               |                   |                                              |                   |                          |
| <3.31                   | 1.0 (referent)                                | 1.0 (referent)    | 1.0 (referent)                               | 1.0 (referent)    | 0.23                     |
| 3.31 - 7.84             | 1.06 [0.69, 1.62]                             | 0.99 [0.64, 1.52] | 1.76 [1.14, 2.73]                            | 1.71 [1.09, 2.69] |                          |
| 7.84 - 16.99            | 1.10 [0.72, 1.67]                             | 1.0 [0.66, 1.51]  | 1.75 [1.13, 2.71]                            | 1.69 [1.07, 2.66] |                          |
| 16.99 – 60.14           | 1.44 [0.97, 2.1]                              | 1.19 [0.8, 1.76]  | 1.96 [1.28, 3.01]                            | 1.77 [1.13, 2.76] |                          |
| >60.14                  | 1.79 [1.25, 2.56]                             | 1.38 [0.92, 2.06] | 3.12 [2.11, 4.62]                            | 2.68 [1.75, 4.1]  |                          |
| <b>Urine NGAL</b>       |                                               |                   |                                              |                   |                          |
| < 3.15                  | 1.0 (referent)                                | 1.0 (referent)    | 1.0 (referent)                               | 1.0 (referent)    | 0.01                     |
| 3.15 - 6.96             | 1.32 [0.85, 2.03]                             | 1.32 [0.85, 2.03] | 1.69 [1.1, 2.61]                             | 1.44 [0.94, 2.21] |                          |
| 6.96 - 16.11            | 1.73 [1.16, 2.57]                             | 1.53 [1.01, 2.33] | 1.68 [1.09, 2.59]                            | 1.45 [0.95, 2.23] |                          |
| 16.11 – 102.37          | 1.52 [1.01, 2.3]                              | 1.28 [0.83, 1.98] | 2.35 [1.57, 3.51]                            | 1.86 [1.24, 2.78] |                          |
| >102.37                 | 1.61 [1.07, 2.41]                             | 1.33 [0.87, 2.05] | 2.5 [1.68, 3.72]                             | 1.75 [1.16, 2.63] |                          |
| <b>Urine KIM-1</b>      |                                               |                   |                                              |                   |                          |
| <0.13                   | 1.0 (referent)                                | 1.0 (referent)    | 1.0 (referent)                               | 1.0 (referent)    | 0.13                     |
| 0.13 - 0.31             | 1.39 [0.9, 2.16]                              | 1.30 [0.83, 2.01] | 1.08 [0.72, 1.63]                            | 0.98 [0.65, 1.46] |                          |
| 0.31 - 0.6              | 1.33 [0.85, 2.08]                             | 1.26 [0.8, 1.96]  | 1.38 [0.94, 2.03]                            | 1.21 [0.83, 1.77] |                          |
| 0.6 - 1.19              | 1.74 [1.15, 2.63]                             | 1.45 [0.94, 2.24] | 1.75 [1.23, 2.51]                            | 1.60 [1.12, 2.28] |                          |
| >1.19                   | 2.13 [1.44, 3.15]                             | 1.80 [1.2, 2.7]   | 1.85 [1.3, 2.64]                             | 1.68 [1.18, 2.41] |                          |
| <b>Urine L-FABP</b>     |                                               |                   |                                              |                   |                          |
| < 2.82                  | 1.0 (referent)                                | 1.0 (referent)    | 1.0 (referent)                               | 1.0 (referent)    | 0.04                     |
| 2.82 - 10.68            | 1.13 [0.77, 1.67]                             | 1.11 [0.76, 1.61] | 1.59 [1.07, 2.37]                            | 1.54 [1.04, 2.29] |                          |
| 10.68 - 37.36           | 0.96 [0.63, 1.44]                             | 0.85 [0.56, 1.29] | 1.53 [1.02, 2.29]                            | 1.43 [0.95, 2.16] |                          |
| 37.36 – 175.82          | 1.4 [0.98, 2]                                 | 1.21 [0.84, 1.72] | 1.52 [1.02, 2.28]                            | 1.38 [0.92, 2.07] |                          |
| >175.82                 | 1.33 [0.93, 1.92]                             | 1.23 [0.84, 1.81] | 2.37 [1.64, 3.41]                            | 1.93 [1.3, 2.87]  |                          |
| <b>Urine Cystatin C</b> |                                               |                   |                                              |                   |                          |
| <0.01                   | 1.0 (referent)                                | 1.0 (referent)    | 1.0 (referent)                               | 1.0 (referent)    | 0.31                     |
| 0.01 - 0.12             | 1.13 [0.78, 1.65]                             | 1.03 [0.7, 1.5]   | 1.40 [0.97, 2.02]                            | 1.38 [0.96, 1.99] |                          |
| 0.12 - 0.2              | 1.32 [0.93, 1.89]                             | 1.26 [0.88, 1.81] | 1.43 [0.98, 2.09]                            | 1.32 [0.91, 1.93] |                          |
| 0.2 - 0.3               | 1.30 [0.9, 1.87]                              | 1.11 [0.77, 1.61] | 1.34 [0.91, 1.96]                            | 1.33 [0.91, 1.94] |                          |
| >0.3                    | 1.01 [0.67, 1.51]                             | 0.90 [0.6, 1.35]  | 1.81 [1.27, 2.57]                            | 1.56 [1.09, 2.22] |                          |
| <b>Urine Albumin</b>    |                                               |                   |                                              |                   |                          |
| <5.6                    | 1.0 (referent)                                | 1.0 (referent)    | 1.0 (referent)                               | 1.0 (referent)    | 0.04                     |
| 5.6 - 10.4              | 1.36 [0.88, 2.09]                             | 1.22 [0.8, 1.87]  | 0.84 [0.57, 1.23]                            | 0.81 [0.55, 1.18] |                          |
| 10.4 - 20.8             | 1.52 [1, 2.3]                                 | 1.36 [0.89, 2.06] | 0.93 [0.64, 1.35]                            | 0.87 [0.61, 1.23] |                          |
| 20.8 - 48.8             | 1.46 [0.96, 2.22]                             | 1.21 [0.79, 1.85] | 1.11 [0.78, 1.57]                            | 1.04 [0.74, 1.47] |                          |

| Quintile Range | eGFR ≤ 60 ml/min/1.73 m <sup>2</sup> (n= 424) |                  | eGFR > 60 ml/min/1.73 m <sup>2</sup> (n=795) |                   | eGFR x Biomarker p-value |
|----------------|-----------------------------------------------|------------------|----------------------------------------------|-------------------|--------------------------|
|                | unadjusted RR                                 | adjusted RR      | unadjusted RR                                | adjusted RR       |                          |
| >48.8          | 1.96 [1.33, 2.88]                             | 1.64 [1.1, 2.45] | 1.71 [1.26, 2.32]                            | 1.52 [1.11, 2.06] |                          |

**Table b - Urinary Creatinine Corrected Early Post-operative Biomarker Quintiles association with Any AKI and interaction with Pre-operative eGFR**

| Quintile                | eGFR ≤ 60 ml/min/1.73 m <sup>2</sup> |                   | eGFR > 60 ml/min/1.73 m <sup>2</sup> |                   | eGFR x Biomarker p-value |
|-------------------------|--------------------------------------|-------------------|--------------------------------------|-------------------|--------------------------|
|                         | unadjusted RR                        | adjusted RR       | unadjusted RR                        | adjusted RR       |                          |
| <b>Urine IL-18</b>      |                                      |                   |                                      |                   |                          |
| <0.21                   | 1.0 (referent)                       | 1.0 (referent)    | 1.0 (referent)                       | 1.0 (referent)    | 0.23                     |
| 0.21-0.35               | 1.78 [1.14, 2.8]                     | 1.8 [1.12, 2.88]  | 1.01 [0.68, 1.51]                    | 0.93 [0.63, 1.38] |                          |
| 0.35-0.65               | 1.25 [0.76, 2.05]                    | 1.26 [0.75, 2.13] | 1.54 [1.09, 2.19]                    | 1.31 [0.92, 1.86] |                          |
| 0.65-2.05               | 1.76 [1.13, 2.72]                    | 1.75 [1.09, 2.82] | 1.5 [1.04, 2.16]                     | 1.18 [0.82, 1.72] |                          |
| >2.05                   | 1.64 [1.03, 2.61]                    | 1.61 [0.97, 2.67] | 1.79 [1.28, 2.5]                     | 1.29 [0.9, 1.86]  |                          |
| <b>Urine NGAL</b>       |                                      |                   |                                      |                   |                          |
| <0.15                   | 1.0 (referent)                       | 1.0 (referent)    | 1.0 (referent)                       | 1.0 (referent)    | 0.03                     |
| 0.15-0.29               | 1.08 [0.68, 1.71]                    | 1.14 [0.72, 1.81] | 1.24 [0.78, 1.97]                    | 1.17 [0.73, 1.89] |                          |
| 0.29-0.66               | 1.43 [0.93, 2.2]                     | 1.42 [0.93, 2.17] | 2.01 [1.33, 3.03]                    | 1.97 [1.29, 2.99] |                          |
| 0.66-4.49               | 1.41 [0.93, 2.14]                    | 1.36 [0.9, 2.05]  | 2.4 [1.61, 3.58]                     | 2.23 [1.47, 3.38] |                          |
| >4.49                   | 1.93 [1.31, 2.86]                    | 1.72 [1.12, 2.66] | 2.85 [1.94, 4.19]                    | 2.4 [1.58, 3.66]  |                          |
| <b>Urine KIM-1</b>      |                                      |                   |                                      |                   |                          |
| <0.01                   | 1.0 (referent)                       | 1.0 (referent)    | 1.0 (referent)                       | 1.0 (referent)    | 0.28                     |
| 0.01-0.015              | 0.85 [0.54, 1.34]                    | 1.03 [0.65, 1.62] | 1.6 [1.1, 2.33]                      | 1.48 [1.02, 2.14] |                          |
| 0.015-0.023             | 0.97 [0.62, 1.51]                    | 0.97 [0.63, 1.51] | 1.6 [1.1, 2.32]                      | 1.5 [1.04, 2.17]  |                          |
| 0.023-0.036             | 1.29 [0.88, 1.89]                    | 1.29 [0.88, 1.9]  | 1.45 [0.98, 2.14]                    | 1.28 [0.87, 1.89] |                          |
| >0.036                  | 1.54 [1.08, 2.2]                     | 1.54 [1.07, 2.21] | 2.07 [1.45, 2.98]                    | 1.8 [1.24, 2.61]  |                          |
| <b>Urine L-FABP</b>     |                                      |                   |                                      |                   |                          |
| <0.10                   | 1.0 (referent)                       | 1.0 (referent)    | 1.0 (referent)                       | 1.0 (referent)    | 0.06                     |
| 0.10-0.51               | 0.86 [0.57, 1.31]                    | 0.79 [0.53, 1.17] | 1.48 [1.03, 2.13]                    | 1.29 [0.9, 1.84]  |                          |
| 0.51-1.95               | 1.02 [0.7, 1.48]                     | 0.9 [0.62, 1.3]   | 1.12 [0.74, 1.67]                    | 0.98 [0.66, 1.47] |                          |
| 1.95-9.52               | 1.07 [0.74, 1.54]                    | 0.98 [0.67, 1.42] | 1.44 [0.99, 2.08]                    | 1.23 [0.85, 1.78] |                          |
| >9.52                   | 1.06 [0.72, 1.55]                    | 0.94 [0.62, 1.41] | 2.07 [1.48, 2.88]                    | 1.66 [1.15, 2.39] |                          |
| <b>Urine Cystatin C</b> |                                      |                   |                                      |                   |                          |
| <0.001                  | 1.0 (referent)                       | 1.0 (referent)    | 1.0 (referent)                       | 1.0 (referent)    | 0.54                     |
| 0.001-0.004             | 1.34 [0.97, 1.86]                    | 1.19 [0.85, 1.66] | 1.36 [0.94, 1.98]                    | 1.27 [0.87, 1.85] |                          |
| 0.004-0.007             | 1.04 [0.71, 1.53]                    | 1 [0.69, 1.47]    | 1.4 [0.98, 2.01]                     | 1.25 [0.87, 1.8]  |                          |
| 0.007-0.01              | 0.97 [0.67, 1.41]                    | 0.9 [0.62, 1.3]   | 1.39 [0.96, 2.01]                    | 1.27 [0.87, 1.83] |                          |
| >0.01                   | 0.99 [0.68, 1.44]                    | 0.99 [0.68, 1.43] | 1.35 [0.93, 1.95]                    | 1.18 [0.82, 1.71] |                          |
| <b>Urine Albumin</b>    |                                      |                   |                                      |                   |                          |
| <0.02                   | 1.0 (referent)                       | 1.0 (referent)    | 1.0 (referent)                       | 1.0 (referent)    | 0.82                     |
| 0.02-0.05               | 1.32 [0.85, 2.04]                    | 1.05 [0.68, 1.62] | 1.05 [0.74, 1.5]                     | 0.98 [0.69, 1.39] |                          |
| 0.05-0.10               | 1.05 [0.67, 1.64]                    | 0.93 [0.6, 1.44]  | 0.99 [0.68, 1.44]                    | 0.97 [0.67, 1.4]  |                          |
| 0.10-0.19               | 1.22 [0.8, 1.88]                     | 1.13 [0.75, 1.71] | 1.42 [1.02, 1.97]                    | 1.28 [0.93, 1.77] |                          |
| >0.19                   | 1.56 [1.04, 2.34]                    | 1.36 [0.9, 2.05]  | 1.56 [1.13, 2.14]                    | 1.36 [0.98, 1.89] |                          |
