# Supplementary material
Source: PubMed Central journal article supplement (PMC4658239)
Supplement: NIHMS717511-supplement-4.pdf [file NIHMS717511-supplement-4.pdf]

**Table S1: Pre-op biomarker values stratified by baseline eGFR**

| <b>Pre-op Biomarkers</b> | <b>eGFR ≤ 60<br/>ml/min/1.73 m<sup>2</sup></b> | <b>eGFR &gt; 60<br/>ml/min/1.73 m<sup>2</sup></b> | <b>P value</b> |
|--------------------------|------------------------------------------------|---------------------------------------------------|----------------|
| <b>IL-18 (pg/mL)</b>     | 11.5 [5.2, 23.8]                               | 16.4 [8.1, 29.2]                                  | <0.0001        |
| <b>NGAL (ng/mL)</b>      | 12.03 [5.78, 28.93]                            | 9.2 [5.1, 17.8]                                   | <0.0001        |
| <b>L-FABP (ng/mL)</b>    | 2.71 [1.30, 7.21]                              | 2.2 [1.0, 4.7]                                    | 0.0006         |
| <b>KIM-1 (ng/mL)</b>     | 1.21 [0.60, 2.43]                              | 1.3 [0.5, 2.6]                                    | 0.65           |
| <b>Cystatin C (mg/L)</b> | 0.16 [0.05, 0.25]                              | 0.17 [0.08, 0.26]                                 | 0.03           |
| <b>Albumin (mg/L)</b>    | 18.9 [6.8, 75.4]                               | 11.0 [5.4, 27.5]                                  | <0.0001        |
