# Supplementary material
Source: PubMed Central journal article supplement (PMC4658239)
Supplement: NIHMS717511-supplement-5.pdf [file NIHMS717511-supplement-5.pdf]

**Table S2: AUC for biomarkers in the early post-operative period for the prediction of AKI**

|            | Any AKI                                 |                                         | Severe AKI                               |                                         |
|------------|-----------------------------------------|-----------------------------------------|------------------------------------------|-----------------------------------------|
|            | eGFR > 60<br>ml/min/1.73 m <sup>2</sup> | eGFR ≤ 60<br>ml/min/1.73 m <sup>2</sup> | eGFR > 60<br>ml/min /1.73 m <sup>2</sup> | eGFR ≤ 60<br>ml/min/1.73 m <sup>2</sup> |
|            | AUC (SE)                                | AUC (SE)                                | AUC (SE)                                 | AUC (SE)                                |
| IL-18      | 0.65 (0.02)                             | 0.61 (0.03)                             | 0.74 (0.05)                              | 0.73 (0.05)                             |
| NGAL       | 0.62 (0.02)                             | 0.58 (0.03)                             | 0.66 (0.06)                              | 0.70 (0.06)                             |
| L-FABP     | 0.61 (0.02)                             | 0.62 (0.03)                             | 0.71 (0.04)                              | 0.70 (0.06)                             |
| KIM-1      | 0.61 (0.02)                             | 0.56 (0.03)                             | 0.64 (0.06)                              | 0.59 (0.07)                             |
| Cystatin C | 0.53 (0.02)                             | 0.53 (0.03)                             | 0.49 (0.06)                              | 0.66 (0.07)                             |
| UACR       | 0.60 (0.02)                             | 0.60 (0.03)                             | 0.69 (0.05)                              | 0.69 (0.06)                             |
