# Supplementary material
Source: PubMed Central journal article supplement (PMC4658239)
Supplement: NIHMS717511-supplement-6.pdf [file NIHMS717511-supplement-6.pdf]

**Table S3 –Association of Log-transformed (base 2) Continuous Urine Creatinine adjusted Early Post-operative Biomarkers with Any AKI and interaction with Baseline eGFR**

| Biomarker | eGFR ≤ 60 ml/min/1.73 m <sup>2</sup> (n= 424) |                   | eGFR > 60 ml/min/1.73 m <sup>2</sup> (n=795) |                   | eGFR x Biomarker p-value |
|-----------|-----------------------------------------------|-------------------|----------------------------------------------|-------------------|--------------------------|
|           | unadjusted RR                                 | adjusted RR       | unadjusted RR                                | adjusted RR       |                          |
| IL-18     | 1.07 [1.02, 1.12]                             | 1.04 [0.98, 1.1]  | 1.14 [1.11, 1.18]                            | 1.12 [1.08, 1.17] | 0.0052                   |
| NGAL      | 1.03 [0.99, 1.07]                             | 1.02 [0.98, 1.07] | 1.08 [1.04, 1.11]                            | 1.03 [1, 1.07]    | 0.19                     |
| KIM-1     | 1.17 [1.07, 1.28]                             | 1.13 [1.03, 1.24] | 1.2[1.11, 1.3]                               | 1.16 [1.07, 1.26] | 0.62                     |
| LFABP     | 1.02 [0.98, 1.05]                             | 1.01 [0.97, 1.05] | 1.07 [1.03, 1.1]                             | 1.04 [1.01, 1.08] | 0.1                      |
| CysC      | 0.9[0.84, 0.96]                               | 0.92 [0.86, 1]    | 0.99 [0.92, 1.07]                            | 0.96 [0.89, 1.03] | 0.13                     |
| Albumin   | 1.05 [0.98, 1.12]                             | 1.05 [0.97, 1.12] | 1.08 [1.02, 1.15]                            | 1.05 [0.98, 1.12] | 0.75                     |
