# Supplementary material
Source: PubMed Central journal article supplement (PMC4658239)
Supplement: NIHMS717511-supplement-7.pdf [file NIHMS717511-supplement-7.pdf]

**Table S4– Spearman Correlation\* of first post-operative biomarkers**

|            | NGAL | L-FABP | KIM-1 | Cystatin C | Urine Albumin |
|------------|------|--------|-------|------------|---------------|
| IL-18      | 0.75 | 0.55   | 0.58  | 0.42       | 0.60          |
| NGAL       |      | 0.60   | 0.38  | 0.41       | 0.59          |
| L-FABP     |      |        | 0.14  | 0.27       | 0.41          |
| KIM-1      |      |        |       | 0.24       | 0.53          |
| Cystatin C |      |        |       |            | 0.31          |

\*all correlations are  $p < 0.0001$
