# Supplementary material
Source: PubMed Central journal article supplement (PMC4658239)
Supplement: NIHMS717511-supplement-8.pdf [file NIHMS717511-supplement-8.pdf]

**Table S5 - Pre-op biomarkers quintiles for the prediction of Any AKI dichotomized by Preoperative eGFR**

| Quintile Range          | eGFR ≤ 60 ml/min/1.73 m <sup>2</sup> |                   | eGFR > 60 ml/min/1.73 m <sup>2</sup> |                   | eGFR x Biomarker p-value |
|-------------------------|--------------------------------------|-------------------|--------------------------------------|-------------------|--------------------------|
|                         | unadjusted RR                        | adjusted RR       | unadjusted RR                        | adjusted RR       |                          |
| <b>Urine IL-18</b>      |                                      |                   |                                      |                   |                          |
| <5.22                   | 1.0 (referent)                       | 1.0 (referent)    | 1.0 (referent)                       | 1.0 (referent)    | 0.13                     |
| 5.22-11.33              | 1.2 [0.83, 1.73]                     | 1.17 [0.8, 1.7]   | 1.16 [0.83, 1.61]                    | 1.16 [0.84, 1.61] |                          |
| 11.33-18.76             | 0.97 [0.66, 1.43]                    | 0.94 [0.64, 1.39] | 1.22 [0.87, 1.69]                    | 1.2 [0.86, 1.66]  |                          |
| 18.76-32.70             | 1.05 [0.72, 1.52]                    | 1.14 [0.78, 1.67] | 1.08 [0.76, 1.52]                    | 1.1 [0.78, 1.56]  |                          |
| >32.70                  | 0.99 [0.7, 1.41]                     | 1.05 [0.74, 1.5]  | 1.13 [0.79, 1.61]                    | 1.19 [0.83, 1.7]  |                          |
| <b>Urine NGAL</b>       |                                      |                   |                                      |                   |                          |
| <4.59                   | 1.0 (referent)                       | 1.0 (referent)    | 1.0 (referent)                       | 1.0 (referent)    | 0.86                     |
| 4.59-7.68               | 1.04 [0.73, 1.48]                    | 0.96 [0.67, 1.36] | 0.97 [0.69, 1.37]                    | 1.07 [0.76, 1.51] |                          |
| 7.68-12.95              | 1.13 [0.79, 1.62]                    | 1.11 [0.78, 1.58] | 0.89 [0.63, 1.25]                    | 0.89 [0.63, 1.26] |                          |
| 12.95-26.40             | 1.31 [0.93, 1.85]                    | 1.45 [1.05, 2.01] | 0.82 [0.58, 1.16]                    | 0.87 [0.62, 1.24] |                          |
| >26.40                  | 1.18 [0.83, 1.69]                    | 1.16 [0.81, 1.66] | 1.11 [0.81, 1.53]                    | 1.12 [0.82, 1.54] |                          |
| <b>Urine KIM-1</b>      |                                      |                   |                                      |                   |                          |
| <0.41                   | 1.0 (referent)                       | 1.0 (referent)    | 1.0 (referent)                       | 1.0 (referent)    | 0.8                      |
| 0.41-0.92               | 1 [0.68, 1.47]                       | 1.07 [0.73, 1.55] | 1.18 [0.84, 1.65]                    | 1.12 [0.8, 1.57]  |                          |
| 0.92-1.71               | 1.05 [0.72, 1.53]                    | 1.09 [0.76, 1.58] | 0.95 [0.66, 1.36]                    | 0.91 [0.63, 1.3]  |                          |
| 1.71-2.97               | 1.12 [0.77, 1.63]                    | 1.12 [0.79, 1.59] | 1.1 [0.79, 1.55]                     | 1.09 [0.78, 1.52] |                          |
| >2.97                   | 1.15 [0.79, 1.67]                    | 1.16 [0.79, 1.72] | 1.33 [0.96, 1.82]                    | 1.33 [0.97, 1.82] |                          |
| <b>Urine L-FABP</b>     |                                      |                   |                                      |                   |                          |
| <0.88                   | 1.0 (referent)                       | 1.0 (referent)    | 1.0 (referent)                       | 1.0 (referent)    | 0.03                     |
| 0.88-1.80               | 0.8 [0.5, 1.27]                      | 0.69 [0.45, 1.08] | 1.02 [0.74, 1.4]                     | 0.99 [0.72, 1.35] |                          |
| 1.80-3.14               | 1.15 [0.77, 1.71]                    | 1.1 [0.75, 1.6]   | 0.78 [0.55, 1.12]                    | 0.81 [0.58, 1.15] |                          |
| 3.14-7.07               | 1.1 [0.74, 1.64]                     | 0.92 [0.62, 1.37] | 1.14 [0.84, 1.56]                    | 1.17 [0.86, 1.59] |                          |
| >7.07                   | 1.54 [1.09, 2.18]                    | 1.39 [0.99, 1.95] | 1.09 [0.78, 1.51]                    | 1.06 [0.76, 1.48] |                          |
| <b>Urine Cystatin C</b> |                                      |                   |                                      |                   |                          |
| <0.04                   | 1.0 (referent)                       | 1.0 (referent)    | 1.0 (referent)                       | 1.0 (referent)    | 0.74                     |
| 0.04-0.13               | 1.41 [1, 1.99]                       | 1.42 [1, 2.04]    | 1.46 [0.97, 2.18]                    | 1.45 [0.97, 2.18] |                          |
| 0.13-0.20               | 1.39 [0.98, 1.99]                    | 1.48 [1.03, 2.12] | 1.73 [1.18, 2.53]                    | 1.82 [1.24, 2.68] |                          |
| 0.20-0.27               | 1.31 [0.9, 1.9]                      | 1.3 [0.89, 1.89]  | 1.74 [1.19, 2.55]                    | 1.9 [1.29, 2.8]   |                          |
| >0.27                   | 1.08 [0.74, 1.59]                    | 1.15 [0.78, 1.68] | 1.36 [0.91, 2.03]                    | 1.45 [0.96, 2.19] |                          |
| <b>Urine Albumin</b>    |                                      |                   |                                      |                   |                          |
| <4.70                   | 1.0 (referent)                       | 1.0 (referent)    | 1.0 (referent)                       | 1.0 (referent)    | 0.99                     |
| 4.70-9.30               | 0.86 [0.52, 1.43]                    | 0.94 [0.56, 1.58] | 0.93 [0.65, 1.32]                    | 0.95 [0.67, 1.36] |                          |
| 9.30-18.40              | 1.08 [0.69, 1.7]                     | 1.27 [0.81, 1.99] | 1.04 [0.73, 1.48]                    | 1.14 [0.81, 1.6]  |                          |
| 18.40-60.20             | 1.51 [1.02, 2.23]                    | 1.42 [0.95, 2.14] | 1.36 [0.98, 1.89]                    | 1.39 [1, 1.93]    |                          |
| >60.20                  | 1.46 [0.99, 2.14]                    | 1.5 [1, 2.26]     | 1.55 [1.12, 2.15]                    | 1.62 [1.18, 2.24] |                          |
