# Supplementary material
Source: PubMed Central journal article supplement (PMC4658239)
Supplement: NIHMS717511-supplement-9.pdf [file NIHMS717511-supplement-9.pdf]

**Table S6 : The change in post-operative biomarker concentration in those with and without a eGFR > 60 ml/min/1.73m<sup>2</sup> for the detection of All AKI**

| Log transformed delta biomarkers | eGFR ≤60 ml/min//1.73m <sup>2</sup> |                   | eGFR > 60 ml/min/1.73m <sup>2</sup> |                   | eGFR x Biomarker p-value |
|----------------------------------|-------------------------------------|-------------------|-------------------------------------|-------------------|--------------------------|
|                                  | unadjusted RR                       | adjusted RR       | unadjusted RR                       | adjusted RR       |                          |
| <b>Urine IL-18</b>               | 1.07 [1, 1.13]                      | 1.04 [0.97, 1.12] | 1.12 [1.06, 1.18]                   | 1.12 [1.06, 1.19] | 0.1                      |
| <b>Urine NGAL</b>                | 1.05 [0.99, 1.11]                   | 1.05 [0.98, 1.13] | 1.06 [1.01, 1.11]                   | 1.04 [0.98, 1.1]  | 0.94                     |
| <b>Urine KIM-1</b>               | 1.03 [0.87, 1.24]                   | 0.94 [0.78, 1.14] | 1.13 [1.01, 1.27]                   | 1.03 [0.91, 1.17] | 0.61                     |
| <b>Urine L-FABP</b>              | 1.08 [0.96, 1.21]                   | 1.08 [0.97, 1.2]  | 1.14 [1, 1.29]                      | 1.14 [0.99, 1.31] | 0.14                     |
| <b>Urine Cystatin C</b>          | 1.03 [0.97, 1.09]                   | 1.02 [0.96, 1.09] | 1.1 [1.04, 1.15]                    | 1.09 [1.03, 1.15] | 0.36                     |
| <b>Urine Albumin</b>             | 1.08 [0.97, 1.21]                   | 1.1 [0.97, 1.25]  | 1.21 [1.11, 1.33]                   | 1.17 [1.07, 1.29] | 0.21                     |
